# Supplementary material for: Icariin activates far upstream element binding protein 1 to regulate hypoxia-inducible factor-1α and hypoxia-inducible factor-2α signaling and benefits chondrocytes
Source: PeerJ journal article supplement (doi:10.7717/peerj.15917), 2023-08-22
Supplement: Raw_data.zip [file ICA MTS.xlsx]

## Sheet: Sheet1
			Con	0.5uM ICA	1uM ICA	2uM ICA
			0.245	0.378	0.547	0.348
			0.297	0.397	0.587	0.357
			0.247	0.347	0.589	0.347
		M	0.263	0.374	0.574333	0.350667
		SD	0.0294618	0.0252389	0.0236925	0.00550757
		P		0.00772909	0.000140338	0.00714976
