# Supplementary material for: Icariin activates far upstream element binding protein 1 to regulate hypoxia-inducible factor-1α and hypoxia-inducible factor-2α signaling and benefits chondrocytes
Source: PeerJ journal article supplement (doi:10.7717/peerj.15917), 2023-08-22
Supplement: Raw_data.zip [file No. of colony.xlsx]

## Sheet: Sheet1
	Con	ICA	FUBP1-KD	ICA-FUBP1-KD	FUBP1-OE	ICA-FUBP1-OE
	30	69	20	20	60	80
	35	64	22	18	65	85
	25	51	24	25	64	70
M	30	61.3333	22	21	63	78.3333
SD	5	9.29157	2	3.60555	2.64575	7.63763
P		0.00677508		0.696008		0.0303374
