# Supplementary material for: Icariin activates far upstream element binding protein 1 to regulate hypoxia-inducible factor-1α and hypoxia-inducible factor-2α signaling and benefits chondrocytes
Source: PeerJ journal article supplement (doi:10.7717/peerj.15917), 2023-08-22
Supplement: Raw_data.zip [file OD-20230706.xls]

## Sheet: Sheet1
FUBP1	Con	ICA	FUBP1-KD	ICA+FUBP1-KD	FUBP1-OE	ICA+FUBP1-OE		FUBP1	Sample1	Sample2	Sample3	Mean	/GAPDH
	0.172625	0.334761	0.0888922	0.0933037	0.512396	1.02184		Con	10146.5	13297.4	14365.5			0.172625	0.226233	0.244405
	0.226233	0.269762	0.0807757	0.0740849	0.414548	0.821817		ICA	21714.5	17498.2	20377.2			0.334761	0.269762	0.314146
	0.244405	0.314146	0.08892	0.0957925	0.513108	1.01782		FUBP1-KD	5852.89	5318.48	5854.72			0.0888922	0.0807757	0.08892
								ICA-FUBP1-KD	6002.79	4766.33	6162.91			0.0933037	0.0740849	0.0957925
								FUBP1-OE	33164.3	26831.2	33210.5			0.512396	0.414548	0.513108
HIF-1α								ICA-FUBP1-OE	63362.3	50959.2	63113.1			1.02184	0.821817	1.01782
	0.233539	0.310909	0.0549015	0.141134	0.721937	1.33373		HIF-1α
	0.171376	0.435252	0.0392714	0.154362	0.624285	1.52981		Con	13726.9	10073.1	15277.6			0.233539	0.171376	0.259922
	0.259922	0.322806	0.0494368	0.13155	0.771838	1.22419		ICA	20167.2	28232.9	20938.9			0.310909	0.435252	0.322806
								FUBP1-KD	3614.85	2585.73	3255.05			0.0549015	0.0392714	0.0494368
								ICA-FUBP1-KD	9080	9931.07	8463.41			0.141134	0.154362	0.13155
SOX9								FUBP1-OE	46726.7	40406.3	49956.5			0.721937	0.624285	0.771838
	0.310726	0.434339	0.0472027	0.089069	0.631806	1.13624		ICA-FUBP1-OE	82701.6	94860.3	75909.6			1.33373	1.52981	1.22419
	0.329275	0.43809	0.0589465	0.101786	0.530689	1.12292
	0.234044	0.370311	0.0518886	0.123193	0.689866	1.19201
								SOX9
Col2α								Con	18263.8	19354	13756.6			0.310726	0.310726	0.234044
	0.242226	0.329586	0.132622	0.20781	0.77113	1.34351		ICA	28173.6	28416.9	27020.4			0.434339	0.434339	0.41656
	0.23238	0.363787	0.121745	0.165188	0.733919	1.32588		FUBP1-KD	3107.95	3881.19	3416.48			0.0472027	0.0472027	0.0518886
	0.252628	0.390965	0.140255	0.181415	0.710136	1.30493		ICA-FUBP1-KD	5730.35	6548.5	7625.74			0.089069	0.089069	0.11853
								FUBP1-OE	40893.1	34348.3	44650.9			0.631806	0.631806	0.689866
								ICA-FUBP1-OE	70456.2	69630	73914.3			1.13624	1.13624	1.19201
HIF-2α								GAPDH
	0.513739	0.161638	0.0917434	0.0645078	0.872927	0.452264		Con	58556.1	58967.2	58809.5	58777.6
	0.6829	0.173796	0.075397	0.048176	0.848466	0.4265		ICA	64770.2	64587.3	65238.9	64865.5
	0.593278	0.164779	0.0697954	0.0649048	1.10658	0.45372		FUBP1-KD	65596.2	65865.3	66066.3	65842.6
								ICA-FUBP1-KD	63927.5	64427.9	64652.8	64336.1
								FUBP1-OE	64312.1	64945.5	64914.6	64724.1
MMP9								ICA-FUBP1-OE	61483.5	62377.8	62162.4	62007.9
	0.514705	0.119945	0.0895978	0.0696131	1.03922	0.158002
	0.598579	0.106916	0.0793989	0.0744406	0.938078	0.174153
	0.54713	0.137463	0.113003	0.0579384	1.00463	0.162984
								Col2α				Mean
								Con	35240.9	33808.4	36754.3			0.242226	0.23238	0.252628
								ICA	50346.8	55571.2	59722.8			0.329586	0.363787	0.390965
								FUBP1-KD	20199.5	18542.8	21362.1			0.132622	0.121745	0.140255
								ICA-FUBP1-KD	32270.4	25651.7	28171.5			0.20781	0.165188	0.181415
								FUBP1-OE	113460	107985	104486			0.77113	0.733919	0.710136
								ICA-FUBP1-OE	178657	176311	173526			1.34351	1.32588	1.30493
								HIF-2α
								Con	74742.8	99353.8	86314.8			0.513739	0.6829	0.593278
								ICA	24691.4	26548.6	25171.2			0.161638	0.173796	0.164779
								FUBP1-KD	13973.4	11483.6	10630.5			0.0917434	0.075397	0.0697954
								ICA-FUBP1-KD	10017.3	7481.16	10078.9			0.0645078	0.048176	0.0649048
								FUBP1-OE	128438	124839	162816			0.872927	0.848466	1.10658
								ICA-FUBP1-OE	60140.9	56714.8	60334.5			0.452264	0.4265	0.45372
								MMP9
								Con	74883.4	87086	79600.8			0.514705	0.598579	0.54713
								ICA	18322.5	16332.3	20998.6			0.119945	0.106916	0.137463
								FUBP1-KD	13646.6	12093.2	17211.4			0.0895978	0.0793989	0.113003
								ICA-FUBP1-KD	10810.1	11559.7	8997.13			0.0696131	0.0744406	0.0579384
								FUBP1-OE	152906	138024	147816			1.03922	0.938078	1.00463
								ICA-FUBP1-OE	21010.6	23158.3	21673.2			0.158002	0.174153	0.162984
								GAPDH				Mean
								Con	145643	146101	144721	145488
								ICA	152484	152801	152988	152758
								FUBP1-KD	152636	152261	152030	152309
								ICA-FUBP1-KD	156396	155225	154244	155288
								FUBP1-OE	146216	147010	148178	147135
								ICA-FUBP1-OE	131212	132946	134774	132977
