# Supplementary material for: Icariin activates far upstream element binding protein 1 to regulate hypoxia-inducible factor-1α and hypoxia-inducible factor-2α signaling and benefits chondrocytes
Source: PeerJ journal article supplement (doi:10.7717/peerj.15917), 2023-08-22
Supplement: Raw_data.zip [file Qpcr detection and analysis of data.xls]

## Sheet: Sheet1
Sample ID	Gene	Cт	Ct Mean	Ct SD	Gene	Ct	Ct Mean	Ct SD	△Ct	△Ct Mean	△△Ct	RQ（2-△△Ct）	RQ Mean	RQ SD
FUBP1-CON	FUBP1	28.39	28.0233	0.370045	GAPDH	17.98	18.21	0.20664	10.18	9.81333	0.366667	0.775572	1.0221	0.260912
		28.03				18.38			9.82		0.00666667	0.99539
		27.65				18.27			9.44		-0.373333	1.29534
FUBP1-KD	FUBP1	29.74	29.3167	0.368284	GAPDH	18.73	18.5733	0.198578	11.1667	10.7433	1.35333	0.391387	0.535781	0.125916
		29.14				18.64			10.5667		0.753333	0.593231
		29.07				18.35			10.4967		0.683333	0.622725
FUBP1-OE	FUBP1	28.03	27.8733	0.136504	GAPDH	18.72	18.6567	0.10116	9.37333	9.21667	-0.44	1.3566	1.51666	0.1396
		27.78				18.71			9.12333		-0.69	1.61328
		27.81				18.54			9.15333		-0.66	1.58008
